21 **ABSTRACT**

22

23 Spatial learning is peculiar. It can occur continuously and stimuli of the world need to be  
24 encoded according to some spatial organisation. Recent evidence showed that insects categorise  
25 visual memories as whether their gaze is facing left vs. right from their goal, but how such  
26 categorisation is achieved during learning remains unknown. Here we analysed the movements  
27 of ants exploring the world around their nest, and used a biologically constrained neural model  
28 to show that such parallel, lateralized visual memories can be acquired straightforwardly and  
29 continuously as the agent explore the world. During learning, ‘left’ and ‘right’ visual memories  
30 can be formed in different neural compartments (of the mushroom bodies lobes) through  
31 existing lateralised dopaminergic neural feedback from pre-motor areas (the lateral accessory  
32 lobes) receiving output from path integration (in the central complex). As a result, path  
33 integration organises visual learning ‘internally’, without the need to be expressed through  
34 behaviour; and therefore, views can be learnt continuously (without suffering memory  
35 overload) while the insect is free to explore the world randomly or using any other navigational  
36 mechanism. After learning, this circuit produces robust homing performance in a 3D  
37 reconstructed natural habitat despite a noisy visual recognition performance. Overall this  
38 illustrates how continuous bidirectional relationships between pre-motor areas and visual  
39 memory centres can orchestrate latent spatial learning and produce efficient navigation  
40 behaviour.

41

42 **List of abbreviations:**

43 **PI:** Path integration; **MB:** Mushroom Body; **CX:** Central complex; **LAL:** Lateral accessory  
44 lobes; **MBON:** Mushroom body output neuron. **DAN:** Dopaminergic neuron

45

46

47 **MAIN**

48

49 Insect navigators such as ants, bees and wasps rapidly learn the visual surroundings to navigate  
50 efficiently to places of interest such as the nest or food sources <sup>1</sup>. These long-term visual  
51 memories are formed in a brain area called the **Mushroom Bodies (MBs)**<sup>2,3</sup>. The neural  
52 circuitry of the MBs is ideally suited to encode, store and compare arbitrary input (visual,  
53 olfactory, or other) in a way that enables a visually navigating insect to learn and then assess  
54 whether the visual scene currently perceived is familiar or not <sup>4,5</sup>. After learning, the MBs output  
55 ‘familiarity signals’ that can be used for guidance along familiar routes or back to place of  
56 interest <sup>4,6,7</sup>. However, how learning is orchestrated in the first place is unclear.

57

58 As during experimental conditioning, experiencing an event bearing an innate positive or  
59 negative valence (so called the US in learning theory) can trigger the learning of the surrounding  
60 visual scenery (which can be viewed as the CS). For instance, experiencing sucrose at a feeder  
61 location will trigger visual learning events that are useful to return to this rewarding place <sup>8-10</sup>.  
62 Inversely, ants experiencing a negative event such as falling into a pit-trap will memorise the  
63 visual scenes experienced just before falling as aversive; and hence avoid this region of the  
64 world in the subsequent trips <sup>11,12</sup>. These examples involve a reinforcer (reward or punishment)  
65 and thus fall under the umbrella of ‘reinforcement learning’. However, spatial learning also  
66 occurs in the absence of distinctive reward or punishment, for instance, when exploring the  
67 world. Indeed, navigating insects tend to learn continuously: weather along routes, around their  
68 nest (during so-called learning walks or learning flight) but also when at novel albeit quite  
69 neutral locations <sup>13-15</sup>. This tendency to learn continuously when exploring the world is shared  
70 with other navigating animals too, and has been dubbed ‘latent learning’ in opposition to  
71 ‘reinforcement learning’ in learning theory <sup>16</sup>

72 Whether ‘latent’ or ‘reinforcement-based’, spatial learning implies that the stimuli of the world  
73 are encoded according to some spatial organisation. For navigating ants, it has been suggested  
74 that learning of the visual surroundings may happen only when the ant is facing specific  
75 directions of interests, such as when its gaze is oriented towards the goal <sup>17-21</sup> the anti-goal <sup>6,22,23</sup>  
76 or along their route direction <sup>4,7,24-26</sup>. At the naïve stage, this directional information can be  
77 provided by **path integration (PI)**. PI continuously provides the insect’s current position  
78 relative to its goal, whether the nest or a food source <sup>27</sup>. It has thus been suggested that path

79 integration is used to both enable the physical alignment of the insect's body and gaze towards  
80 its goal (or anti-goal) and trigger a visual learning event at such appropriate times <sup>19,28</sup>.

81 PI is computed in a brain area called the **Central complex (CX)**, the seat of the insect  
82 representation of directions <sup>29–32</sup>. However, how the right information from the path integrator  
83 is mediated to the MBs for orchestrating visual learning remains entirely unknown<sup>33</sup>.

84 Recently, it was shown that ants (and likely wasps <sup>34</sup>) may not learn views specifically when  
85 facing the goal or anti-goal direction, but when facing left and right from their goal <sup>35</sup>. Left-to-  
86 the-goal and right-to-the-goal memories explains why ants can recognise egocentric views  
87 when misaligned with their goal and trigger the appropriate turning commands <sup>34–36</sup>, but  
88 summon an explanation for how left/right categorisation of visual memories is achieved  
89 neurally during learning.

90

91 Here we show how such categorisation can be achieved neurally and continuously, providing a  
92 mechanistic explanation for spatial, latent learning. We analysed the movements of ants  
93 displaying learning walks around their nest, and used computational modelling to show that  
94 existing neural feedback from pre-motor area (**the lateral accessory lobes, LAL**) receiving the  
95 path integration output from the CX, can organise the formation of these lateralized visual  
96 memories in the MBs. Our biologically constrained architecture shows that learning events can  
97 then be achieved randomly or continuously; literally sparing both the need to 'control the timing  
98 of learning' as well as the need to align the agent's body in any particular direction.  
99 Remarkably, the MBs can support continuous learning of thousands of views without suffering  
100 memory overload, because only novel information recruits new synapses. After learning, the  
101 architecture can produce remarkably robust homing performance in reconstruction of complex  
102 natural habitats <sup>37</sup>, as observed in homing ants <sup>38–41</sup>.

103

#### 104 **Ants look in all directions during learning walks.**

105

106 During learning walks, naïve ants display meandering trajectories around their nest, often  
107 exploring different directions multiple times before venturing further <sup>21</sup>. Artificially restraining  
108 these exploratory movements (in both time and space) reduces the ants' subsequent  
109 navigational performance based on terrestrial cues, showing that they do learn the scenery  
110 during these exploratory behaviours <sup>39,41</sup>. At a finer scale, these meandering trajectories are  
111 interspaced with regular slowing down up to complete halts, producing behaviours so-called

112 votes or scans, whose expression varies across species and individuals<sup>42,43</sup>. Slowing down and  
113 pausing helps the ants obtain a stable (and thus non-blurry) view and therefore surely  
114 contributes to visual learning. This is corroborated by the fact that these pauses are typically  
115 displayed in situation when learning is needed<sup>9,11,15,19,44–48</sup>. It was shown in some species that  
116 ants tend to display longer pauses when their gaze is aligned towards the nest<sup>19,43</sup> or anti-nest<sup>22</sup>  
117 directions.

118  
119 Here, by analysing the learning walks recorded at high frame rate of two species of ants  
120 (*Myrmecia croslandi* and *Melophorus bagoti*), we found no systematic association between  
121 such pauses and some particular nest-centred or allocentric directions (Fig. 1c, Extended data  
122 Fig. 3). In contrast, ants (pausing or not) exposed their gaze to a large, homogenous diversity  
123 of directions and locations around their nest (Fig. 1c, Extended data 3). While we acknowledge  
124 that ants may sometimes pause for a longer period of time while looking in the direction of their  
125 goal, what is clear is that learning walks are rather optimised to collect a diverse sample of  
126 views in all directions. This is in line with previous works showing that pauses and scans are  
127 not tightly controlled by the relation with the ant and its environment, but rather are the result  
128 of 'blind' internal motor processes such as the continuous production of regular oscillations in  
129 the ant's angular and forward speed<sup>22,49</sup> as well as the random triggering of pauses<sup>42</sup>. This  
130 stochasticity is further highlighted by the great variability in the expression of learning walks  
131 observed across individuals<sup>50</sup>.

132  
133

### 134 **Visual learning in the MB lobes can be organised by lateralized dopaminergic feedback** 135 **from pre-motor areas.**

136

137 Previous works have suggested that ants and wasps categorise views as whether their gaze is  
138 oriented towards the left vs. right in relation to the nest heading direction<sup>34,35</sup>; but if ants look  
139 in all directions during their learning walks, how do they achieve such a left vs. right  
140 categorisation?

141

142 We realised that due to the Path integration – the ability to integrate compass and distance  
143 information to keep track of the nest relative position<sup>51</sup> – the output of the **Central complex**  
144 (**CX**) to the **Lateral Accessory Lobe (LAL)** provides the desirable information: the left (or  
145 right) LAL's hemisphere activity correlates with moments when the nest relative position is on

146 the left (or right) of the ant current heading direction<sup>32,52</sup>. The LAL are pre-motor areas sending  
147 steering commands to neurons descending to the thorax<sup>49,53</sup>. When PI is controlling guidance  
148 for homing, these lateralized output signals are used to trigger ‘turn left’ and ‘turn right’  
149 compensatory motor commands to align the insect’s body towards its nest, hence resulting in  
150 homing behaviour. However, when PI is not used to home – such as when ant display a learning  
151 walk – we reason that the LAL’s output could nonetheless be used, not for steering, but to  
152 control ‘internally’ whether the current view should be categorised as left or right from the goal  
153 during learning (Fig. 1a).

154  
155 Interestingly, the insect brain possesses the perfect neural candidate to do so: direct  
156 dopaminergic projections from the LALs to the MBs lobes<sup>54</sup>(Fig. 1a), that is, where long-term  
157 visual memories are formed due to dopamine release<sup>55,56</sup>. The left and right dopaminergic  
158 feedback from the LAL – which could thus indicate in real time whether the nest is left or right  
159 of the current heading – project to different compartments of the MBs lobes (see Fig. 4D of<sup>54</sup>);  
160 so that ‘left-to-the-goal’ and ‘right-to-the-goal’ memories could be formed in the input synapses  
161 of different **MB output neurons (MBONs)**, literally updating separated memory banks as the  
162 individual explores the scene: the ‘left-to-the-goal’ memory bank is updated when the nest  
163 direction is on the left side of the insects current facing direction, and vice versa. Note that  
164 other neural candidates could equally achieve the desired LAL-to-MBs learning signals, albeit  
165 indirectly. For instance, some feedback from pre-motor areas modulate dopaminergic neurons  
166 that in turn, trigger synaptic modulation in the MBs lobes<sup>57,58</sup>.

167

168

169 **Homing can be achieved through opponent lateralized signals from the MBs to the CX.**

170

171 Once the views are memorised and categorised as left vs right, subsequent homing – based on  
172 these learnt views – requires to convey the familiarity signals from the MB lobes to the LAL  
173 for steering. We have strong behavioural and neurobiological evidence to constrain our  
174 explanation of how this might happen.

175 1- Connectomic<sup>52</sup> and experimentation in ants<sup>35</sup> shows that navigation based on learnt  
176 views is achieved indirectly, by updating a goal heading compass direction, likely in the  
177 fan-shaped body of the CX, which in turns control steering in the LAL. Interestingly,  
178 this seems to work only if the familiarity signals sent to the CX are decorrelated between

179 the left and right hemispheres, with the signal from the left (and right) hemisphere  
180 indicating when the animal current heading is biased towards the left (or right)  
181 compared to the goal direction <sup>35</sup>.

182 2- Connectomic suggests that the MBs lobes send the familiarity signals to the CX either  
183 directly <sup>59</sup>, or through one relay in the dorsal brain areas (such as the SIP) <sup>52</sup>, where most  
184 MBONs converge ipsilaterally (<sup>59</sup>. Such a relay notably enables the integration of  
185 antagonist MBON (and other) signals conveying opposite valences through simple  
186 inhibition ([good - bad], or [bad - good]) <sup>60</sup>. This produces an opponent-like process  
187 which improves the estimation of the valence of the current situation and appears to be  
188 at play during visual navigation in ants <sup>6,23</sup>.

189 3- Some dopaminergic neurons from the left and right LAL – which are thought here to  
190 organise learning at the first place (see previous section) – both project bilaterally in the  
191 MB lobes in a symmetrical manner (see Fig.4D <sup>54</sup>, suggesting that both left and right  
192 hemispheric MBs encode both left and right view memories in two different MBs lobes  
193 compartments each (4 different compartments in total) (Fig. 1a ‘DAN’).

194 We realised here that these three points naturally converged into one picture (Fig.1a,b), which  
195 produces a set of predictions:

196 1- In each hemisphere, ‘left and right memories’ are formed in MBs compartment  
197 conveying opposite valence, in a symmetrical manner (Fig. 1a ‘DAN’, point 3 above).

198 2- During homing, the resulting ‘left and right familiarity signals’ (mediated by different  
199 MBONs) are then integrated ipsilaterally (in the dorsal brain area relay) as an opponent  
200 process (Fig. 1b ‘MBON’, point 2 above).

201 3- Due to the symmetry, this integration is achieved in an opposite manner in each  
202 hemisphere (Left – Right familiarity in the left hemisphere; and Right – Left familiarity  
203 in the right hemisphere) Fig. 1b ‘SIP’).

204 4- Both opponent signals are then sent to the CX ipsilaterally, providing the desired  
205 uncorrelated left and right familiarity input to the CX (point 1 above) (Fig. 1b, ‘FB’).

206

## 207 **A robust circuit for navigation in noisy visual environments.**

208

209 To proof-test the validity of this circuit as a whole, we modelled both the MBs and the CX  
210 based on connectomic data as achieved before (for MB: <sup>4</sup>, for CX: <sup>32</sup>), and coupled these two

211 brain regions using the mentioned LAL-to-MBs connections for learning views, and MB-SIP-  
212 CX connections for using views (Fig. 1, Extended data Fig. 1). This circuit was implemented  
213 into an agent with ant-eye-like resolution ( $10^\circ/\text{pixel}$ , Fig.1.h), immersed in a realistic VR  
214 reconstruction of *Myrmecia* ants' natural habitat<sup>37</sup> (Fig.1g).

215

216 For learning, we let the agent reproduce recorded natural learning walks of a *Myrmecia* ant  
217 (Fig. 1c, Extended data Fig.2; data provided by Jochen Zeil), with the outputs of its path  
218 integrator (computed in the CX) to the left and right LALs (Fig.1c, yellow and orange) driving  
219 the dopaminergic feedbacks that control learning. Learning in the MB is achieved following  
220 what is observed in insects: by depressing the currently active KCs' output synapses onto the  
221 MBONs, only in the MBs compartments where the associated dopaminergic feedback is  
222 concomitantly active<sup>55,61</sup>. After completion of the learning walk, we transferred the agent  
223 deprived of PI (i.e. as a so called Zero-Vector agent) to a new location in the world and let the  
224 visual familiarity based on the left and right memories – as outputted by the MBONs – drive  
225 the two FB inputs to update the desired heading direction in the CX. The CX, in turn, outputs  
226 left and right turning commands to the LAL, which drives the agent (Fig.1,b, Extended data  
227 Fig.1). This produces a remarkably robust homing ability, as well as a tight search around the  
228 nest without the need to fine tune parameters (Fig. 1f, Extended data Fig. 2), providing further  
229 credibility to this circuit.

230

231

### 232 **When to learn? No need to bother.**

233

234 Interestingly, our model shows that the timing and positions at which the view is sampled along  
235 learning walks are not important. The model can afford to learn sporadically, at random position  
236 or continuously (it is operational whether it uses 90 views or 30,000 views for learning) (see  
237 Extended data Fig. 2), bypassing the need for additional mechanisms that controls 'when to  
238 learn' or 'how to align the body to learn'. Memory load is not a problem either: even when  
239 learning continuously (i.e., here at 100fps), 20,000 KCs proved largely sufficient to store the  
240 information from the large amount of views (e.g., 13638 views) experienced along a learning  
241 walks sampled at high frame rate (100 fps). Saturation is prevented because additional memory  
242 space is used only when significantly novel views are perceived: already learnt views activate  
243 KCs that have already switched their synaptic output, and thus yield no further change.  
244 Acquiring visual memories in this way results in a steep learning curve at first, but then



245 spontaneously plateaus as the explored regions around the nest become familiar (Fig. 1e). In  
246 addition, our model vastly underestimates the ants' (and hymenopteran navigators in general)  
247 memory capacity ( $>100,000$  KCs<sup>62,63</sup> and  $>100$  MBONs<sup>64</sup>), ignores pruning principles that  
248 can increase effective memory capacity, bypasses any visual pre-processing that can compress  
249 information, and reduces the complexity of synaptic connections to simple binary connections  
250 between neurons. Hence, we are confident that learning views around the nest in such a way  
251 should occupy only a fraction of the real ants' memory capacity.

252

## 253 **General discussion**

254 We have shown how existing neural connections between the CX (computing path integration),  
255 the LAL (a pre-motor area) and the MB (seat of the visual memories), could enable an insect  
256 to orchestrate spatial learning. An agent equipped with this circuit can quickly learn the visual  
257 surrounding and subsequently home from novel locations using very low-resolution views  
258 ( $10^\circ$ /pixel, Fig. 1h) of its natural environment (Fig. 1). Several differences contrast this circuit  
259 from previous accounts.

260

261 First, views are encoded egocentrically (i.e. recognition is view-point dependant), which is in  
262 adequation with most of the literature<sup>24,65-69</sup> and contrast with recent models who assumed that  
263 visual memories can be rotationally invariant (recognition is independent of the gaze  
264 orientation)<sup>7,70</sup>. The latter requires computational steps, such as Fourier transforms, which  
265 potential implementation in insect circuits remains unknown. Instead, assuming an egocentric  
266 encoding enables to remain faithful to the known insect neural circuits and corroborates the  
267 behavioural evidence that ants' visual scene recognition requires the insect to align its gaze as  
268 during training<sup>66,71-73</sup> as well as the regular need of insects to scan multiple directions  
269 <sup>21,42,49,74,75</sup>.

270

271 Second, our circuit is built on the evidence that memorised views are categorised as oriented  
272 left vs. right rather than towards or away from the goal<sup>34,35</sup>. This was key, as this left/right  
273 information can be directly provided by the LAL during learning, due to the mechanism of path  
274 integration in the CX.

275

276 Third, it was previously assumed that path integration serves as a scaffold for visual learning  
277 through behaviour: the insect would use PI to physically align its body in a direction of interest

278 (towards or away from the nest, or along a route) and then memorise the view perceived at this  
279 precise moment <sup>19,20,43</sup>. Here, PI still serves as a scaffold for visual learning, but does so  
280 ‘internally’ without the need to express through behaviour. As a consequence, views can be  
281 learnt continuously while the insect freely explores the world using other mechanisms. With  
282 this in mind, ants learning walks <sup>21</sup> and early meandering trajectories <sup>50,76,77</sup> appear optimised  
283 to sample views quickly in as many locations and orientations around the nest as possible (Fig1  
284 c,d; Extended data Fig. 3). Also, since all views becomes useful whatever their orientation, it  
285 explains how views acquired during outbound trips can be equally categorised effectively to  
286 serve subsequent homing <sup>46,73,78</sup>, as well as the ants’ ability to recognise views whatever their  
287 body orientation when on highly familiar regions <sup>35</sup>.

288

289 Fourth, navigation robustness arises here from multiple reasons. As shown before, visual  
290 recognition in the MBs is intrinsically noisy, partly because of the way memories are  
291 compressed in the KCs, and partly because of the proximal clutter (blade of grasses, etc...) that  
292 an insect may encounter when walking on the floor or flying through bushes <sup>4,5</sup>. Part of this  
293 noise is alleviated by having the noisy MBs familiarity signal being send to the CX (as  
294 in <sup>7,25,33,35</sup>, which acts as a directional buffer due to its much more stable heading encoding based  
295 on multiple sources of compass <sup>30</sup>. The current circuit provides an additional level of robustness,  
296 through redundancy, as each view is simultaneously compared to four memory banks in parallel  
297 (Fig.1b, ‘MBONs’). Although the input from each eye is sent to both left and right hemispheric  
298 MBs <sup>63</sup>, the random pattern of connectivity in the KCs input <sup>79–81</sup> makes each MBs different.  
299 As a result, this architecture literally provides four independent assessments of whether the  
300 insect’s current heading is too much on the left vs. the right of its goal direction. Additional  
301 assessments, for instance based on recent vs. longer-term memories, may likely recruit more  
302 MBs compartments and make the recognition process more redundant.

303

304 Finally, the dopaminergic internal feedback from the LAL – necessary to categorise learning  
305 into different MB lobes compartments – also predicts a strong link between locomotion and  
306 activity in the MB, with rapid shifts of dopaminergic activity across the MB lobes as the insects  
307 is moving in the world. This corroborates recent observations in drosophila that dopamine  
308 release in the brain strongly correlates with the animals’ movements <sup>58,82</sup>, and indeed, shifts  
309 dynamically across the MBs lobes <sup>57,83</sup>. Overall, this supports the view that the MBs provide an  
310 active coding that operates in a tight closed-loop with the ongoing behaviour.

311 Which actual neurons convey the desired PI information from the LAL to the MBs to categorise  
312 visual learning in ants, wasps or bees remains to be identified, but given the existence of such  
313 direct (or indirect) connections in various insects that are not central place foragers<sup>54</sup>, we can  
314 easily envision how the ability to perform path integration may have enabled the evolution of  
315 the ability to home using learnt views.

316

317

## 318 **MATERIALS AND METHODS**

319

### 320 **Neural model**

321 We used a simple agent-based model in a closed loop in a 3D virtual environment. All  
322 simulations were performed in Python 3.x.<sup>6</sup> The neural model connectivity is described in  
323 Extended data Fig. 1, and code is available on request.

### 324 **Parameters description**

325 **Motor noise:** at each time step, a directional ‘noise angle’ is drawn randomly from a Gaussian  
326 distribution of  $\pm SD = \text{motor noise}$ , and added to the agent’s current direction.

327 **Memory decay:** proportion of Fan-shaped Body Neurons (FBN, see extended Fig.1 for details)  
328 activity lost at each time step: For each FBN:  $\text{Activity}_{(t+1)} = \text{Activity}_{(t)} \times (1 - \text{memory decay})$ .  
329 This corresponds to the speed at which the memory of the vector representation in the FBN  
330 decays. A memory decay = 1 means that the vector representation in the FBN is used only for  
331 the current time step and entirely overridden by the next inputs. A memory decay = 0 means  
332 that the vector representation acts as a perfect accumulator across the whole paths (as for Path  
333 Integration), which is probably unrealistic.

334 **Motor gain:** Sets the gain to convert the motor neuron signals (see extended Fig.1 for details)  
335 into an actual turn amplitude (turn amplitude = turning neuron signal  $\times$  gain). Note that here,  
336 the motor gain is presented across orders of magnitude. One order of magnitude higher means  
337 that the agent will be one order of magnitude more sensitive to the turning signal.

338

### 339 **3D world and view rendering**

340 The virtual environment used in our model was generated by the software Habitat3D<sup>84</sup>, an  
341 open-source tool which provides photorealistic meshes of natural scenes from point clouds  
342 acquired with help of a LiDAR scanner (IMAGER 5006i). This environment is mapped on the  
343 habitat of *Myrmecia* ants from Canberra, Australia<sup>37</sup>. The mesh spans a diameter of around 65

344 metres and features large eucalyptus trees and the distant panorama cues (Fig. 1g). This dataset  
345 can be found on the Insect Vision webpage (<https://insectvision.dlr.de/3d-reconstruction->  
346 [tools/habitat3d](https://insectvision.dlr.de/3d-reconstruction-tools/habitat3d)). For speed optimization purposes, we down-sampled the originally high-  
347 resolution mesh with the open-source software Blender into a lower number of vertices; the  
348 rendering was then realized in OpenGL, with the Python libraries Plyfile and PyOpenGL. This  
349 3D model enabled us to render panoramic views from any location as a 360-degree picture. We  
350 chose input only the blue channel of the RGB scene, resulting in only one luminance value per  
351 pixel. Also, the skybox was a pure blue uniform colour. That way, as with UV in natural scenes  
352 <sup>85,86</sup>, blue provides a strong contrast between the sky and the terrestrial scene. This approximates  
353 the type of visual information used by navigating ants <sup>87,88</sup>. Views were cropped vertically so  
354 that the bottom, floor-facing part was discarded. Finally, views were downsampled at 10°/pixel  
355 (see Fig. 1h), and we extracted the edges by subtracting for each pixel the summed value of its  
356 8 neighbours, mimicking lateral inhibition across ommatidia. As a result, the visual information  
357 that the model receives is a small rectangular matrix of single-channel, floating point values  
358 representing the above-horizon panorama (see Fig. 1h).

359

### 360 **Learning walks trajectories analysis**

361 We analysed learning walks trajectories of *Myrmecia croslandi* ants recorded at 100fps  
362 (courtesy of Jochen Zeil, from a data set used in <sup>22</sup>) and *Melophorus bagoti* ants recorded at  
363 300fps (from a data set used in <sup>15</sup>). Trajectories were analysed using Matlab (R2016b  
364 Matworks). Code and data are available on request.

365

366

### 367 **ACKNOWLEDGMENTS**

368 I am grateful to Florent Le Moël for setting up the python environment to run agent-based-  
369 simulations, as well as to Rüdiger Wehner, Paul Graham, Tom Collett and Michael Mangan for  
370 their useful feedbacks on an earlier draft of the manuscript. This study was funded by the  
371 European Research Council 759817-EMERG-ANT ERC-2017-STG

372

373

### 374 **REFERENCES**

375 1. Collett, M., Chittka, L., and Collett, T.S. (2013). Spatial memory in insect navigation. *Current*  
376 *biology* : CB 23, R789–R800.

- 377 2. Buehlmann, C., Wozniak, B., Goulard, R., Webb, B., Graham, P., and Niven, J.E. (2020).  
378 Mushroom bodies are required for learned visual navigation, but not for innate visual behavior, in  
379 ants. *Current Biology* 30, 3438–3443.
- 380 3. Kamhi, J.F., Barron, A.B., and Narendra, A. (2020). Vertical lobes of the mushroom bodies are  
381 essential for view-based navigation in Australian *Myrmecia* ants. *Current Biology* 30, 3432–3437.
- 382 4. Ardin, P., Peng, F., Mangan, M., Lagogiannis, K., and Webb, B. (2016). Using an Insect Mushroom  
383 Body Circuit to Encode Route Memory in Complex Natural Environments. *PLOS Computational*  
384 *Biology* 12, e1004683. [10.1371/journal.pcbi.1004683](https://doi.org/10.1371/journal.pcbi.1004683).
- 385 5. Webb, B., and Wystrach, A. (2016). Neural mechanisms of insect navigation. *Current Opinion in*  
386 *Insect Science* 15, 27–39. [10.1016/j.cois.2016.02.011](https://doi.org/10.1016/j.cois.2016.02.011).
- 387 6. Le Möel, F., and Wystrach, A. (2020). Opponent processes in visual memories: A model of  
388 attraction and repulsion in navigating insects' mushroom bodies. *PLoS computational biology* 16,  
389 e1007631.
- 390 7. Sun, X., Yue, S., and Mangan, M. (2020). A decentralised neural model explaining optimal  
391 integration of navigational strategies in insects. *Elife* 9, e54026.
- 392 8. Bolek, S., Wittlinger, M., and Wolf, H. (2012). What counts for ants? How return behaviour and  
393 food search of *Cataglyphis* ants are modified by variations in food quantity and experience. *Journal*  
394 *of Experimental Biology* 215, 3218–3222. [10.1242/jeb.071761](https://doi.org/10.1242/jeb.071761).
- 395 9. Nicholson, D.J., Judd, S.P.D., Cartwright, B.A., and Collett, T.S. (1999). Learning walks and  
396 landmark guidance in wood ants (*Formica rufa*). *Journal of Experimental Biology* 202, 1831–1838.
- 397 10. Wei, C., Rafalko, S., and Dyer, F. (2002). Deciding to learn: modulation of learning flights in  
398 honeybees, *Apis mellifera*. *Journal of Comparative Physiology A* 188, 725–737.
- 399 11. Freas, C.A., Wystrach, A., Schwarz, S., and Spetch, M.L. (2022). Aversive view memories and risk  
400 perception in navigating ants. *Scientific Reports* 12, 2899.
- 401 12. Wystrach, A., Buehlmann, C., Schwarz, S., Cheng, K., and Graham, P. (2020). Rapid Aversive and  
402 Memory Trace Learning during Route Navigation in Desert Ants. *Current Biology* 30, 1927-  
403 1933.e2. [10.1016/j.cub.2020.02.082](https://doi.org/10.1016/j.cub.2020.02.082).
- 404 13. Kohler, M., and Wehner, R. (2005). Idiosyncratic route-based memories in desert ants, *Melophorus*  
405 *bagoti*: How do they interact with path-integration vectors? *Neurobiology of Learning and Memory*  
406 83, 1–12.
- 407 14. Mangan, M., and Webb, B. (2012). Spontaneous formation of multiple routes in individual desert  
408 ants (*Cataglyphis velox*). *Behavioral Ecology* 23, 944–954.
- 409 15. Wystrach, A., Philippides, A., Aurejac, A., Cheng, K., and Graham, P. (2014). Visual scanning  
410 behaviours and their role in the navigation of the Australian desert ant *Melophorus bagoti*. *Journal*  
411 *of Comparative Physiology A*, 1–12.
- 412 16. Thistlethwaite, D. (1951). A critical review of latent learning and related experiments.  
413 *Psychological bulletin* 48, 97.
- 414 17. Dewar, A.D., Philippides, A., and Graham, P. (2014). What is the relationship between visual  
415 environment and the form of ant learning-walks? An in silico investigation of insect navigation.  
416 *Adaptive Behavior* 22, 163–179.

- 417 18. Graham, P., Philippides, A., and Baddeley, B. (2010). Animal cognition: multi-modal interactions  
418 in ant learning. *Current Biology* 20, R639–R640. 10.1016/j.cub.2010.06.018.
- 419 19. Müller, M., and Wehner, R. (2010). Path Integration Provides a Scaffold for Landmark Learning in  
420 Desert Ants. *Current Biology* 20, 1368–1371. 10.1016/j.cub.2010.06.035.
- 421 20. Wystrach, A., Mangan, M., Philippides, A., and Graham, P. (2013). Snapshots in ants? New  
422 interpretations of paradigmatic experiments. *The Journal of Experimental Biology* 216, 1766–1770.  
423 10.1242/jeb.082941.
- 424 21. Zeil, J., and Fleischmann, P.N. (2019). The learning walks of ants (Hymenoptera: Formicidae).
- 425 22. Jayatilaka, P., Murray, T., Narendra, A., and Zeil, J. (2018). The choreography of learning walks in  
426 the Australian jack jumper ant *Myrmecia croslandi*. *Journal of Experimental Biology* 221,  
427 jeb185306.
- 428 23. Murray, T., Kocsi, Z., Dahmen, H., Narendra, A., Möel, F.L., Wystrach, A., and Zeil, J. (2019). The  
429 role of attractive and repellent scene memories in ant homing (*Myrmecia croslandi*). *Journal of*  
430 *Experimental Biology*. 10.1242/jeb.210021.
- 431 24. Baddeley, B., Graham, P., Husbands, P., and Philippides, A. (2012). A model of ant route navigation  
432 driven by scene familiarity. *PLoS Comput Biol* 8, e1002336. 10.1371/journal.pcbi.1002336.
- 433 25. Goulard, R., Buehlmann, C., Niven, J.E., Graham, P., and Webb, B. (2021). A unified mechanism  
434 for innate and learned visual landmark guidance in the insect central complex. *PLoS computational*  
435 *biology* 17, e1009383.
- 436 26. Wystrach, A., Cheng, K., Sosa, S., and Beugnon, G. (2011). Geometry, features, and panoramic  
437 views: Ants in rectangular arenas. *Journal of Experimental Psychology: Animal Behavior Processes*  
438 37, 420–435. 10.1037/a0023886.
- 439 27. Collett, T.S. (2019). Path integration: how details of the honeybee waggle dance and the foraging  
440 strategies of desert ants might help in understanding its mechanisms. *Journal of Experimental*  
441 *Biology* 222, jeb205187.
- 442 28. Collett, T.S., Graham, P., Harris, R.A., and Hempel-De-Ibarra, N. (2006). Navigational memories  
443 in ants and bees: Memory retrieval when selecting and following routes. *Advances in the Study of*  
444 *Behavior* 36, 123–172. 10.1016/s0065-3454(06)36003-2.
- 445 29. Le Moël, F., Stone, T., Lihoreau, M., Wystrach, A., and Webb, B. (2019). The Central Complex as  
446 a Potential Substrate for Vector Based Navigation. *Front. Psychol.* 10. 10.3389/fpsyg.2019.00690.
- 447 30. Pfeiffer, K., and Homberg, U. (2014). Organization and Functional Roles of the Central Complex  
448 in the Insect Brain. *Annual Review of Entomology* 59, null. doi:10.1146/annurev-ento-011613-  
449 162031.
- 450 31. Seelig, J.D., and Jayaraman, V. (2015). Neural dynamics for landmark orientation and angular path  
451 integration. *Nature* 521, 186–191. 10.1038/nature14446.
- 452 32. Stone, T., Webb, B., Adden, A., Weddig, N.B., Honkanen, A., Templin, R., Weislo, W., Scimeca,  
453 L., Warrant, E., and Heinze, S. (2017). An Anatomically Constrained Model for Path Integration in  
454 the Bee Brain. *Current Biology* 27, 3069-3085.e11. 10.1016/j.cub.2017.08.052.
- 455 33. Collett, M., and Collett, T.S. (2018). How does the insect central complex use mushroom body  
456 output for steering? *Current Biology* 28, R733–R734. 10.1016/j.cub.2018.05.060.

- 457 34. Stürzl, W., Zeil, J., Boeddeker, N., and Hemmi, J.M. (2016). How Wasps Acquire and Use Views  
458 for Homing. *Current Biology* 26, 470–482. 10.1016/j.cub.2015.12.052.
- 459 35. Wystrach, A., Le Moel, F., Clement, L., and Schwarz, S. (2020). A lateralised design for the  
460 interaction of visual memories and heading representations in navigating ants. *bioRxiv*.
- 461 36. Differt, D., and Stürzl, W. (2021). A generalized multi-snapshot model for 3D homing and route  
462 following. *Adaptive Behavior* 29, 531–548. 10.1177/1059712320911217.
- 463 37. Stürzl, W., Grixia, I., Mair, E., Narendra, A., and Zeil, J. (2015). Three-dimensional models of  
464 natural environments and the mapping of navigational information. *Journal of Comparative*  
465 *Physiology A* 201, 563–584.
- 466 38. Collett, T.S., Graham, P., and Harris, R.A. (2007). Novel landmark-guided routes in ants. *Journal*  
467 *of Experimental Biology* 210, 2025–2032.
- 468 39. Fleischmann, P.N., Rössler, W., and Wehner, R. (2018). Early foraging life: spatial and temporal  
469 aspects of landmark learning in the ant *Cataglyphis noda*. *Journal of Comparative Physiology A*  
470 204, 579–592.
- 471 40. Narendra, A., Gourmaud, S., and Zeil, J. (2013). Mapping the navigational knowledge of  
472 individually foraging ants, *Myrmecia croslandi*. *Proceedings of the Royal Society B: Biological*  
473 *Sciences* 280. 10.1098/rspb.2013.0683.
- 474 41. Wystrach, A., Beugnon, G., and Cheng, K. (2012). Ants might use different view-matching  
475 strategies on and off the route. *The Journal of Experimental Biology* 215, 44–55.  
476 10.1242/jeb.059584.
- 477 42. Deeti, S., Ken, C., Graham, P., and Wystrach, A. (2023). Scanning behaviour in ants: an interplay  
478 between random-rate processes and oscillators. *Journal Of Comparative Physiology. A,*  
479 *Neuroethology, Sensory, Neural, And Behavioral Physiology*.
- 480 43. Fleischmann, P.N., Grob, R., Wehner, R., and Rössler, W. (2017). Species-specific differences in  
481 the fine structure of learning walk elements in *Cataglyphis* ants. *Journal of Experimental Biology*  
482 220, 2426–2435.
- 483 44. Collett, M. (2014). A desert ant's memory of recent visual experience and the control of route  
484 guidance. *Proceedings of the Royal Society B: Biological Sciences* 281. 10.1098/rspb.2014.0634.
- 485 45. Fleischmann, P.N., Grob, R., and Rössler, W. (2022). Magnetosensation during re-learning walks  
486 in desert ants (*Cataglyphis nodus*). *Journal of Comparative Physiology A* 208, 125–133.
- 487 46. Graham, P., and Collett, T.S. (2006). Bi-directional route learning in wood ants. *Journal of*  
488 *Experimental Biology* 209, 3677–3684.
- 489 47. Schwarz, S., Mangan, M., Webb, B., and Wystrach, A. (2020). Route-following ants respond to  
490 alterations of the view sequence. *Journal of Experimental Biology* 223, jeb218701.  
491 10.1242/jeb.218701.
- 492 48. Wystrach, A., Schwarz, S., Schultheiss, P., Beugnon, G., and Cheng, K. (2011). Views, landmarks,  
493 and routes: how do desert ants negotiate an obstacle course? *Journal of Comparative Physiology a-*  
494 *Neuroethology Sensory Neural and Behavioral Physiology* 197, 167–179. 10.1007/s00359-010-  
495 0597-2.
- 496 49. Clement, L., Schwarz, S., and Wystrach, A. (2023). An intrinsic oscillator underlies visual  
497 navigation in ants. *Current Biology* 33, 411-422.e5. 10.1016/j.cub.2022.11.059.

- 498 50. Haalck, L., Mangan, M., Wystrach, A., Clement, L., Webb, B., and Risse, B. (in press). CATER:  
499 Combined Animal Tracking and Environment Reconstruction. *Science Advances*.
- 500 51. Müller, M., and Wehner, R. (1988). Path integration in desert ants, *Cataglyphis fortis*. *Proceedings*  
501 *of the National Academy of Sciences* 85, 5287–5290.
- 502 52. Honkanen, A., Adden, A., Freitas, J. da S., and Heinze, S. (2019). The insect central complex and  
503 the neural basis of navigational strategies. *Journal of Experimental Biology* 222, jeb188854.  
504 10.1242/jeb.188854.
- 505 53. Steinbeck, F., Adden, A., and Graham, P. (2020). Connecting brain to behaviour: a role for general  
506 purpose steering circuits in insect orientation? *Journal of Experimental Biology* 223.  
507 10.1242/jeb.212332.
- 508 54. Wendt, B., and Homberg, U. (1992). Immunocytochemistry of dopamine in the brain of the locust  
509 *Schistocerca gregaria*. *Journal of Comparative Neurology* 321, 387–403.
- 510 55. Aso, Y., Hattori, D., Yu, Y., Johnston, R.M., Iyer, N.A., Ngo, T.-T., Dionne, H., Abbott, L.F., Axel,  
511 R., and Tanimoto, H. (2014). The neuronal architecture of the mushroom body provides a logic for  
512 associative learning. *Elife* 3, e04577.
- 513 56. Heisenberg, M. (2003). Mushroom body memoir: from maps to models. *Nat Rev Neurosci* 4, 266–  
514 275.
- 515 57. Cohn, R., Morante, I., and Ruta, V. (2015). Coordinated and Compartmentalized Neuromodulation  
516 Shapes Sensory Processing in *Drosophila*. *Cell* 163, 1742–1755. 10.1016/j.cell.2015.11.019.
- 517 58. Marquis, M., and Wilson, R.I. (2022). Locomotor and olfactory responses in dopamine neurons of  
518 the *Drosophila* superior-lateral brain. *Current Biology* 32, 5406–5414.
- 519 59. Scaplen, K.M., Talay, M., Fisher, J.D., Cohn, R., Sorkaç, A., Aso, Y., Barnea, G., and Kaun, K.R.  
520 (2021). Transsynaptic mapping of *Drosophila* mushroom body output neurons. *eLife* 10, e63379.  
521 10.7554/eLife.63379.
- 522 60. Eschbach, C., Fushiki, A., Winding, M., Afonso, B., Andrade, I.V., Cocanougher, B.T., Eichler, K.,  
523 Gepner, R., Si, G., Valdes-Aleman, J., et al. (2021). Circuits for integrating learned and innate  
524 valences in the insect brain. *eLife* 10, e62567. 10.7554/eLife.62567.
- 525 61. Cognigni, P., Felsenberg, J., and Waddell, S. (2018). Do the right thing: neural network mechanisms  
526 of memory formation, expression and update in *Drosophila*. *Current Opinion in Neurobiology* 49,  
527 51–58. 10.1016/j.conb.2017.12.002.
- 528 62. Ehmer, B., and Gronenberg, W. (2004). Mushroom body volumes and visual interneurons in ants:  
529 Comparison between sexes and castes. *Journal of Comparative Neurology* 469, 198–213.  
530 10.1002/cne.11014.
- 531 63. Habenstein, J., Amini, E., Grübel, K., el Jundi, B., and Rössler, W. (2020). The brain of *Cataglyphis*  
532 ants: neuronal organization and visual projections. *Journal of Comparative Neurology*.
- 533 64. Rybak, J., and Menzel, R. (1993). Anatomy of the mushroom bodies in the honey bee brain: The  
534 neuronal connections of the alpha-lobe. *Journal of Comparative Neurology* 334, 444–465.  
535 10.1002/cne.903340309.
- 536 65. Baddeley, B., Graham, P., Philippides, A., and Husbands, P. (2011). Models of visually guided  
537 routes in ants: Embodiment simplifies route acquisition. In *Intelligent Robotics and Applications*:



- 538 4th International Conference, ICIRA 2011, Aachen, Germany, December 6-8, 2011, Proceedings,  
539 Part II 4 (Springer), pp. 75–84.
- 540 66. Schwarz, S., Mangan, M., Zeil, J., Webb, B., and Wystrach, A. (2017). How Ants Use Vision When  
541 Homing Backward. *Current Biology* 27, 401–407. [10.1016/j.cub.2016.12.019](https://doi.org/10.1016/j.cub.2016.12.019).
- 542 67. Wehner, R., Michel, B., and Antonsen, P. (1996). Visual navigation in insects: Coupling of  
543 egocentric and geocentric information. *Journal of Experimental Biology* 199, 129–140.
- 544 68. Wystrach, A. (in press). Embodiment, movements and the emergence of decisions. Insights from  
545 insect navigation. *Biochemical and Biophysical Research Communications*.
- 546 69. Zeil, J. (2012). Visual homing: an insect perspective. *Current Opinion in Neurobiology* 22, 285–  
547 293. <http://dx.doi.org/10.1016/j.conb.2011.12.008>.
- 548 70. Stone, T., Mangan, Michael, Wystrach, Antoine, and Webb, Barbara (2018). Rotation invariant  
549 visual processing for spatial memory in insects. *Interface Focus* 8, 20180010.  
550 [10.1098/rsfs.2018.0010](https://doi.org/10.1098/rsfs.2018.0010).
- 551 71. Collett, M., Graham, P., and Collett, T.S. (2017). Insect navigation: what backward walking reveals  
552 about the control of movement. *Current Biology* 27, R141–R144.
- 553 72. Pfeffer, S.E., and Wittlinger, M. (2016). How to find home backwards? Navigation during rearward  
554 homing of *Cataglyphis fortis* desert ants. *Journal of Experimental Biology* 219, 2119–2126.
- 555 73. Schwarz, S., Clement, L., Gkaniats, E., and Wystrach, A. (2019). How do backward walking ants (  
556 *Cataglyphis velox*) cope with navigational uncertainty? (*Animal Behavior and Cognition*)  
557 [10.1101/2019.12.16.877704](https://doi.org/10.1101/2019.12.16.877704).
- 558 74. Baird, E., Byrne, M.J., Smolka, J., Warrant, E.J., and Dacke, M. (2012). The dung beetle dance: an  
559 orientation behaviour? *PLoS One* 7, e30211.
- 560 75. Zeil, J., Kelber, A., and Voss, R. (1996). Structure and function of learning flights in bees and  
561 wasps. *Journal of Experimental Biology* 199, 245–252.
- 562 76. Muser, B., Sommer, S., Wolf, H., and Wehner, R. (2005). Foraging ecology of the thermophilic  
563 Australian desert ant, *Melophorus bagoti*. *Australian Journal of Zoology* 53, 301–311.
- 564 77. Wehner, R., Meier, C., and Zollikofer, C. (2004). The ontogeny of foraging behaviour in desert  
565 ants, *Cataglyphis bicolor*. *Ecological Entomology* 29, 240–250.
- 566 78. Freas, C.A., and Spetch, M.L. (2019). Terrestrial cue learning and retention during the outbound  
567 and inbound foraging trip in the desert ant, *Cataglyphis velox*. *J Comp Physiol A* 205, 177–189.  
568 [10.1007/s00359-019-01316-6](https://doi.org/10.1007/s00359-019-01316-6).
- 569 79. Caron, S.J., Ruta, V., Abbott, L.F., and Axel, R. (2013). Random convergence of olfactory inputs  
570 in the *Drosophila* mushroom body. *Nature* 497, 113–117.
- 571 80. Litwin-Kumar, A., Harris, K.D., Axel, R., Sompolinsky, H., and Abbott, L.F. (2017). Optimal  
572 degrees of synaptic connectivity. *Neuron* 93, 1153–1164.
- 573 81. Szyszka, P., Ditzgen, M., Galkin, A., Galizia, C.G., and Menzel, R. (2005). Sparsening and temporal  
574 sharpening of olfactory representations in the honeybee mushroom bodies. *Journal of*  
575 *neurophysiology* 94, 3303–3313.

- 576 82. Aimon, S., Katsuki, T., Jia, T., Grosenick, L., Broxton, M., Deisseroth, K., Sejnowski, T.J., and  
577 Greenspan, R.J. (2019). Fast near-whole-brain imaging in adult *Drosophila* during responses to  
578 stimuli and behavior. *PLOS Biology* *17*, e2006732. [10.1371/journal.pbio.2006732](https://doi.org/10.1371/journal.pbio.2006732).
- 579 83. Siju, K.P., Štih, V., Aimon, S., Gjorgjieva, J., Portugues, R., and Grunwald Kadow, I.C. (2020).  
580 Valence and State-Dependent Population Coding in Dopaminergic Neurons in the Fly Mushroom  
581 Body. *Current Biology* *30*, 2104–2115.e4. [10.1016/j.cub.2020.04.037](https://doi.org/10.1016/j.cub.2020.04.037).
- 582 84. Risse, B., Mangan, M., Stürzl, W., and Webb, B. (2018). Software to convert terrestrial LiDAR  
583 scans of natural environments into photorealistic meshes. *Environmental modelling & software* *99*,  
584 88–100.
- 585 85. Differt, D., and Möller, R. (2015). Insect models of illumination-invariant skyline extraction from  
586 UV and green channels. *Journal of theoretical biology* *380*, 444–462.
- 587 86. Stone, T., Mangan, M., Ardin, P., and Webb, B. (2014). Sky segmentation with ultraviolet images  
588 can be used for navigation. In *Robotics: Science and Systems (Robotics: Science and Systems)*.
- 589 87. Schultheiss, P., Wystrach, A., Schwarz, S., Tack, A., Delor, J., Nooten, S.S., Bibost, A.-L., Freas,  
590 C.A., and Cheng, K. (2016). Crucial role of ultraviolet light for desert ants in determining direction  
591 from the terrestrial panorama. *Animal Behaviour* *115*, 19–28.
- 592 88. Graham, P., and Cheng, K. (2009). Ants use the panoramic skyline as a visual cue during navigation.  
593 *Current Biology* *19*, R935–R937.
- 594 89. Cassenaer, S., and Laurent, G. (2012). Conditional modulation of spike-timing-dependent plasticity  
595 for olfactory learning. *Nature* *482*, 47.
- 596 90. Honegger, K.S., Campbell, R.A., and Turner, G.C. (2011). Cellular-resolution population imaging  
597 reveals robust sparse coding in the *Drosophila* mushroom body. *Journal of neuroscience* *31*, 11772–  
598 11785.
- 599 91. Aso, Y., Sitaraman, D., Ichinose, T., Kaun, K.R., Vogt, K., Belliard-Guérin, G., Plaçais, P.-Y.,  
600 Robie, A.A., Yamagata, N., Schnaitmann, C., et al. (2014). Mushroom body output neurons encode  
601 valence and guide memory-based action selection in *Drosophila*. *eLife* *3*. [10.7554/eLife.04580](https://doi.org/10.7554/eLife.04580).
- 602 92. Schleyer, M., Fendt, M., Schuller, S., and Gerber, B. (2018). Associative learning of stimuli paired  
603 and unpaired with reinforcement: Evaluating evidence from maggots, flies, bees and rats. *Frontiers*  
604 *in psychology* *9*, 1494.
- 605 93. el Jundi, B. el, Warrant, E.J., Byrne, M.J., Khaldy, L., Baird, E., Smolka, J., and Dacke, M. (2015).  
606 Neural coding underlying the cue preference for celestial orientation. *PNAS* *112*, 11395–11400.  
607 [10.1073/pnas.1501272112](https://doi.org/10.1073/pnas.1501272112).
- 608 94. Green, J., and Maimon, G. (2018). Building a heading signal from anatomically defined neuron  
609 types in the *Drosophila* central complex. *Current Opinion in Neurobiology* *52*, 156–164.  
610 [10.1016/j.conb.2018.06.010](https://doi.org/10.1016/j.conb.2018.06.010).
- 611 95. Kim, S.S., Hermundstad, A.M., Romani, S., Abbott, L.F., and Jayaraman, V. (2019). Generation of  
612 stable heading representations in diverse visual scenes. *Nature* *576*, 126–131.

614 **Figure 1.**

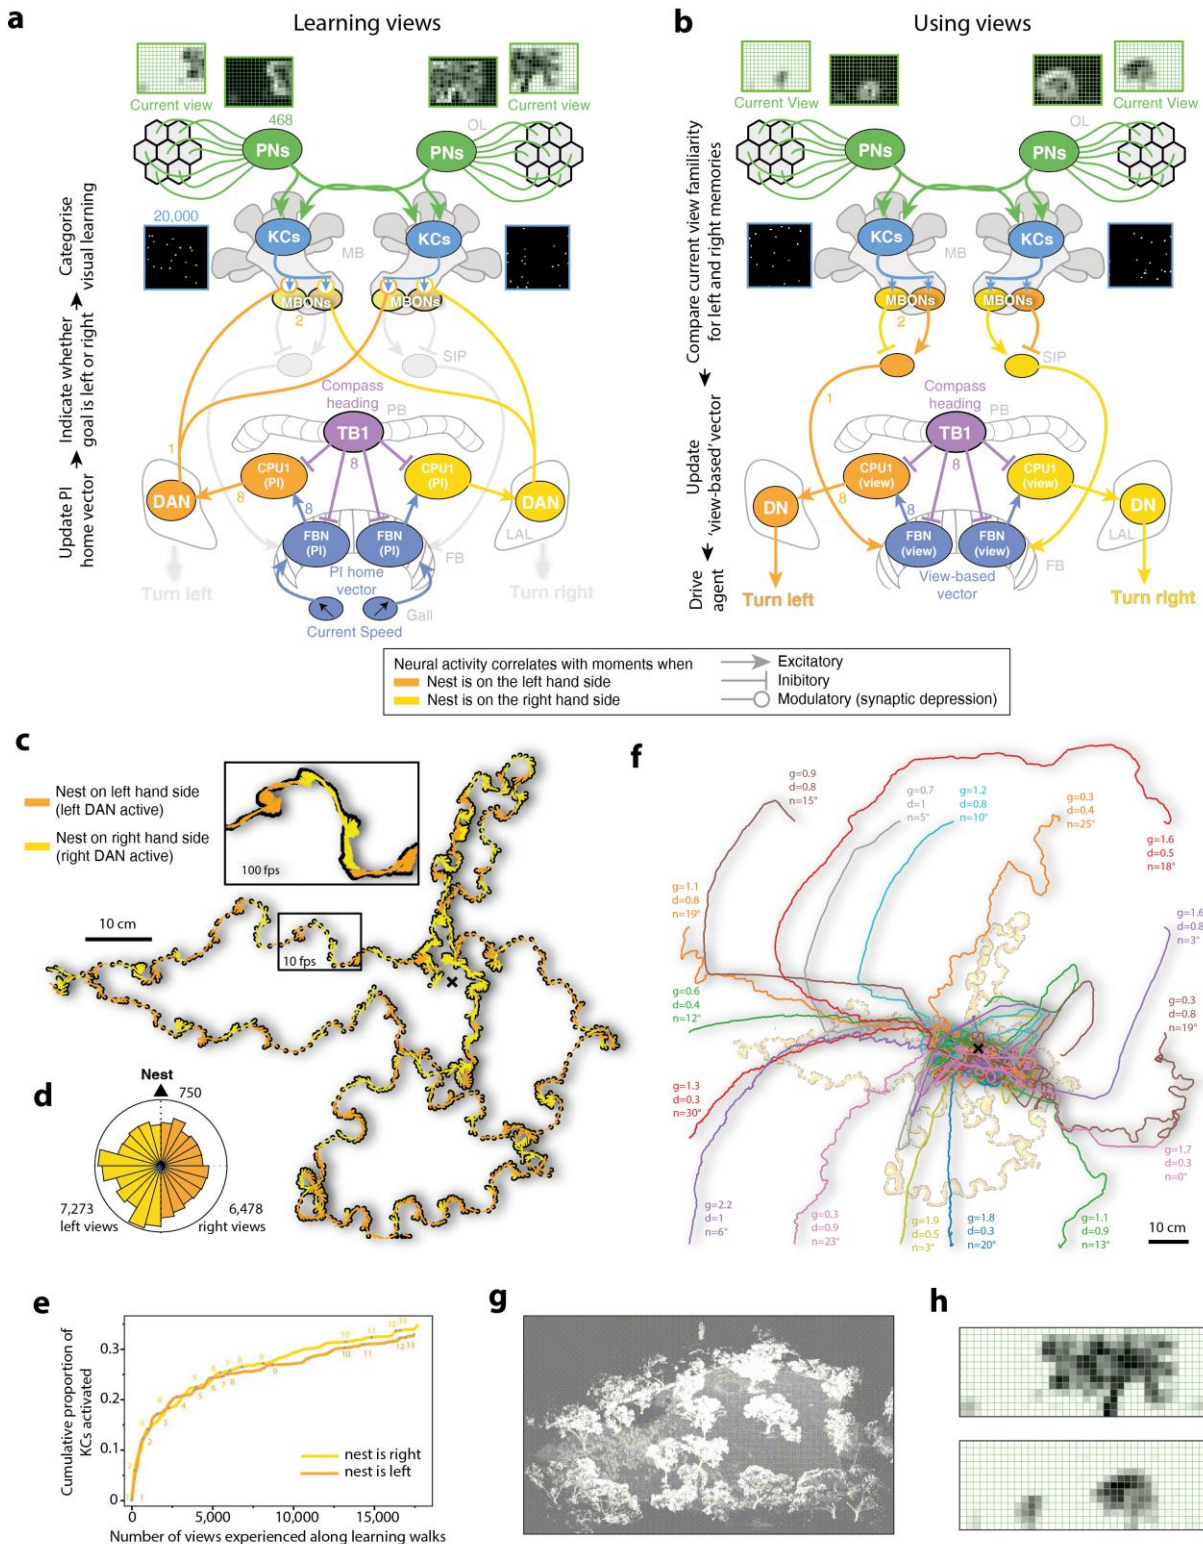

615

616 **Figure 1. A Mushroom Bodies and Central Complex circuit produces robust visual**

617 **navigation. a,b.** Schematic of the model's functional circuitry. The agent's current panoramic

618 view results from its position in the reconstructed world (g), down-sampled at 10 %/pixel (h).

619 Projection Neurons (PNs) sample the whole visual field and form random connections with  
620 Kenyon Cells (KCs), resulting in a pattern of KC activity highly specific to the current view.  
621 Numbers on the left indicate numbers of neurons. See Extended data 1 for details. **a.** During  
622 learning, the central complex is updating a path integration (PI) home vector by integrating  
623 current speed and compass heading information as in <sup>32</sup>. The output of the CX in the left (or  
624 right) hemisphere's LAL, which correlate with the time when the nest is on the left- (or right-)  
625 hand side – and thus can be used to drive left (or right) turns to home by PI – are used instead  
626 to drive dopaminergic neurons (DAN) projecting to the MBs to categorise visual learning.  
627 DANs' activity triggers memory formation by synaptic depression of the currently active KCs  
628 outputs on the associated MBS output neurons (MBONs). **b.** After learning, familiar views  
629 differentially activate MBONs according to the KC-MBON synaptic strengths established  
630 during learning. MBONs' signals are integrated in the SIP (Superior Intermediate  
631 Protocerebrum) as an opponent-like process (Le Möel and Wystrach, 2020) providing a  
632 measure of the likelihood of having the nest on the left or on the right, that is independent of  
633 the overall level of visual familiarity <sup>35</sup>. These lateralized signals then project to the CX (as  
634 shown in figure 3), literally updating a 'view-based vector' representation. Motor control is  
635 effected by the usual CX circuitry based on the current compass heading (as for PI), resulting  
636 in the agent performing turns. (OL: Optic-Lobes, MB: Mushroom-Bodies, SIP: Superior-  
637 Intermediate-Protocerebrum, PB: Protocerebral Bridge, FB: Fan-shaped-Body, LAL: Lateral  
638 Accessory Lobe). **c.** Example of two consecutive learning walks displayed by an individual  
639 *Myrmecia crosslandi* ant (data courtesy of Jochen Zeil) and used by the agent for learning  
640 views. In this example, the agent sampled the world at 100 fps (see inset for realistic  
641 representation of sampled views' positions) approximating the ants visual flicker fusion  
642 frequency and thus assuming continuous learning (Extended data Fig. 2 shows other training  
643 conditions). **d.** Circular histogram of the number of views experienced along the learning walks  
644 (**c**) according to their orientation relative to the nest, showing that the ant exposed its gaze in  
645 all directions relative to the nest (750 indicate the scale at the circle rim). **e.** Cumulative  
646 proportion of KCs activated at least once along 13 consecutive learning walks (Extended data  
647 Fig. 2). The tendency to plateau explains how continuous learning can be supported without  
648 memory saturation. **f.** Paths realised by agents using views (**b**) in closed-loop with the  
649 environment to home from novel release locations around the nest, after learning (**a**) along two  
650 learning walks (**c**). The agents display efficient homing and nest search across a range of  
651 randomly chosen parameter values (g: motor gain; d: FBN decay; n: motor noise, see parameter  
652 description and Extended data Fig. 1 for detailed explanation). **g.** Visual reconstruction of the

653 Myrmecia ants' natural environment <sup>37</sup> used in the current simulation (represented as a points  
654 cloud for clarity). **h.** Example of views drawn from the reconstructed world, down-sampled at  
655 10 °/pixel to ensure that ant resolution is not overestimated.  
656

657 **Extended data figure 1**

**Learning views**

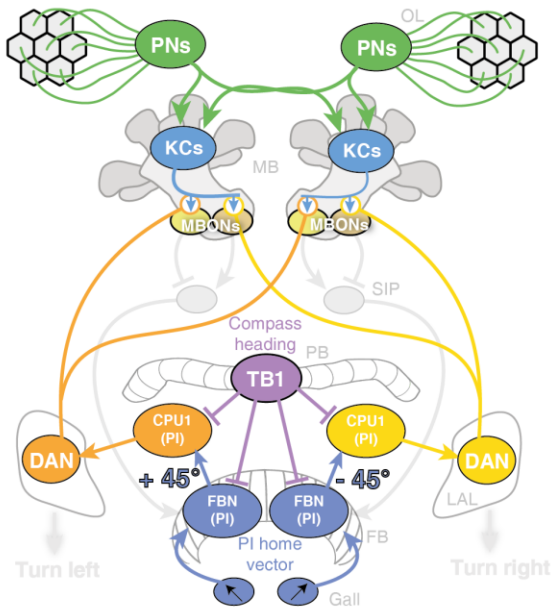

Neural activity correlates with moments when

- Nest is on the left hand side
- Nest is on the right hand side
- Excitatory
- Inhibitory
- Modulatory (synaptic depression)

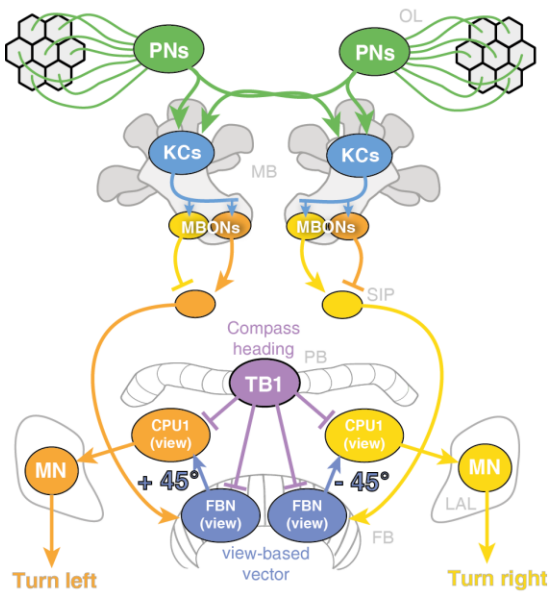

**Using views**

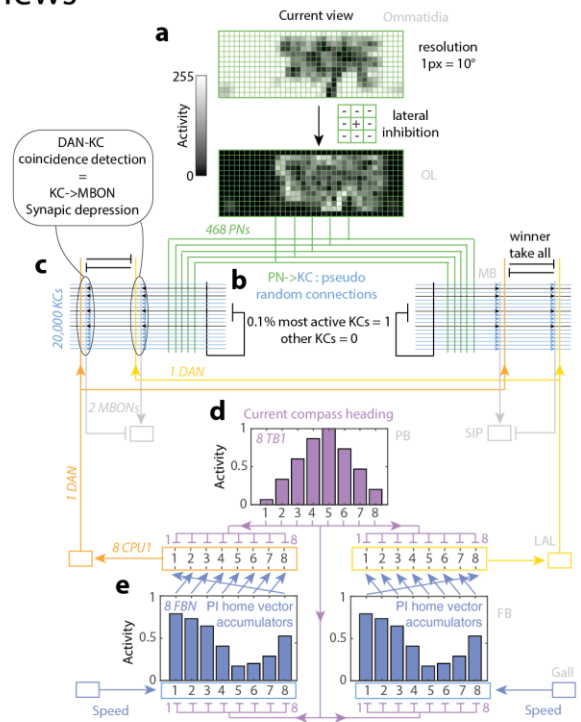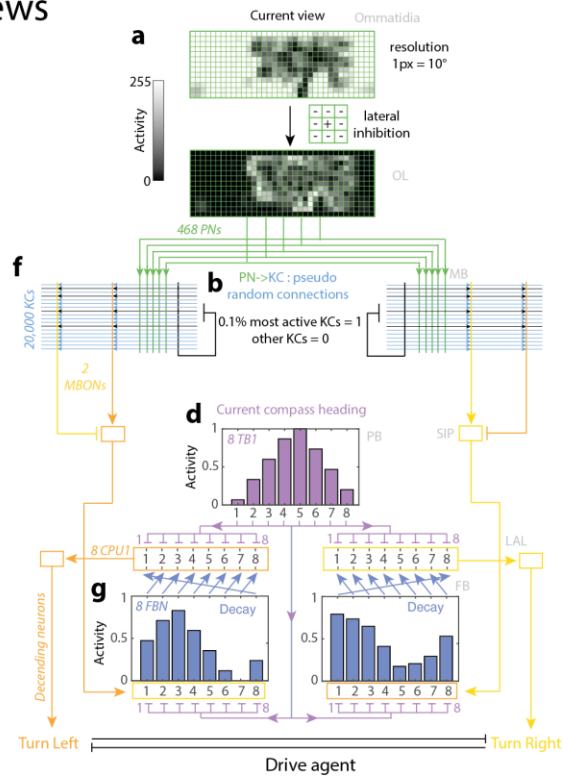

659 **Extended data figure 1. Details of the MB-CX model's circuitry.** Circuitry used for learning  
660 views (top), and using views to drive the trained agent (bottom). Left panels show the scheme  
661 as presented in figure 5, and right panels show the corresponding detailed circuitry.

662 **a.** The agent's current view (360° panoramic, with 90° above and 40° below horizon) is  
663 extracted from the reconstructed world at 10°/pixel, so  $36 \times 13$  pixels = 468 cells. Activity of  
664 the cells correspond to the pixel light intensity (from 0 to 255) and could be seen as representing  
665 the cells' firing rate. The view is processed through lateral inhibition between neighbouring  
666 cells: cell activity = cell activity - ( $\sum$  (all neighbouring cells activity) / number of neighbouring  
667 cells). This well-known early visual pre-processing makes cells respond to contrasted edges in  
668 the view, which is necessary for the downstream Kenyon Cells (KCs) to encode view  
669 specificity.

670 **b.** Each view cell projects (via Projection Neuron, PN) to both hemispheres' Mushroom Bodies  
671 (MB), where it makes pseudo-random connections with KCs: we set each KC to connect to 4  
672 randomly chosen PNs, roughly matching what is observed in insects. We chose 20,000 KCs per  
673 hemisphere, which underestimates the number of KCs in ants (> 100,000). At each time step,  
674 the 0.1% KCs with the strongest input (i.e., the sum of the 4 PNs activities connecting to the  
675 KC, which can be seen as the KC's dendritic excitatory postsynaptic potential) activity would  
676 be set to 1 (reflecting one action potential), the other KCs would be set to 0. This represents the  
677 effect of the inhibitory activity of APL-like-neurons (black neuron) across all KCs, ensuring  
678 that only a few KCs (the ones with strongest input activity) can fire an action potential at a time,  
679 as observed <sup>81,89,90</sup>.

680 **c.** We modelled (in each hemisphere) two compartments of the MBS lobes (surrounded by black  
681 ovals): both compartments are composed of 1 dopaminergic neuron (DAN) associated to 1  
682 MBS output neuron (MBONs), mediating opposite valences as observed across insects <sup>91,92</sup>.  
683 These antagonistic DANs engage in a winner-take-all competition (symbolised by the black  
684 reciprocal inhibition) so that only one kind is active at a time in each hemisphere, as observed  
685 in insects <sup>57</sup>. Initially, all KCs connect to both MBONs with a synaptic weight of 1. At each  
686 time step, synaptic depression happens for the active DAN's compartment mimicking  
687 coincidence detection <sup>55</sup>: the KC-to-MBON weights of each currently active KCs is set to 0,  
688 and will stay so permanently (we did not wish to model forgetting). Due to the activity of the  
689 CX (see (e)), the DANs activity correlates with moments when the nest is left (orange DAN)  
690 or right (yellow DAN) relative to the current body orientation.

691 **d.** Current compass direction is modelled in the protocerebral bridge (PB) as a bump of activity  
692 across 8 neurons forming a ring-attractor, as observed in insects <sup>52</sup>. Each neuron responds

693 maximally for a preferred compass direction,  $45^\circ$  apart from the neighbouring neurons (neuron  
694 1 and 8 are neighbours). Change in the agent's current compass orientation results in a shift of  
695 the bump of activity across the 8 neurons (we did not model how this is achieved from sensory  
696 compass cues (see <sup>30,93–95</sup> for studies dedicated to this matter).

697 **e.** During learning, two representations of the Path Integration (PI) home vector are updated in  
698 the Fan-shaped Body Neurons (FBN) by integrating current speed and compass heading  
699 information (as in <sup>29,70</sup>). Speed input activates all 8 FBN neurons equally, but simultaneous  
700 inhibition from the PB (see d) results in a negative imprinting of the current bump of activity  
701 (inhibition is effected between each paired neuron: 1 inhibits 1; 2 inhibits 2; etc...). FBN  
702 activity is sustained (given a slow decay), and thus acts as a PI home vector accumulator  
703 (Stone). Neurons, called CPU1 in some insects, compare each version of the home vector  
704 neurally shifted by 1 neuron (as if rotating the ring attractor representation by  $45^\circ$  clockwise or  
705 counter-clockwise depending on the hemisphere) with the current compass heading, resulting  
706 in an overall activity in the CPU1 (sum of the 8 CPU1) indicating whether the nest is rather on  
707 the left- (higher activity in the left hemisphere) or right-hand side (higher activity in the right  
708 hemisphere). This left/right differential activity – instead of driving the agent home – is  
709 integrated in a DAN connecting the LAL to the MBs (described in Fig. 4D of <sup>54</sup>) and thus used  
710 to categorise visual learning (see c).

711 **f.** The current view results in a specific pattern of KC activity (a), which activates MBONs  
712 differentially according to the weight of the KC-MBONs connections set during learning (c).  
713 For instance, views similar to the one experienced when the nest was on the left (orange DAN  
714 in (c), trigger KCs with KC-MBON weight set to 0 in this compartment, and thus will activate  
715 mostly the MBON of the other compartment. This differential activity between MBONs is  
716 integrated in the SIP (Superior Intermediate Protocerebrum) in each hemisphere, resulting in  
717 an opponent-like process providing a measure of the likelihood of having the nest on the left or  
718 right that is independent of the overall level of visual familiarity (similarly to <sup>6,23</sup>).

719 **g.** These lateralized signals from the SIP excite a dedicated set of FBN, literally updating a  
720 'view-based vector' representation. The sustainability of such a 'view-based vector' depends  
721 on the FBN activity's decaying rate, which can be varied in our model and has little incidence  
722 on the agent success (Extended Data Fig. 2, parameter decay). Motor control is effected using  
723 the same circuitry than for PI <sup>29,32</sup>: the CPU1 neurons control descending motor neurons (MN),  
724 which difference in activity across hemispheres triggers a left or right turn of various amplitude,  
725 given a 'motor gain' that can be varied to make the agent more or less reactive (see parameter  
726 description).



727 Numbers on the left indicate neuron numbers. Letters on the right indicate brain areas (OL:  
728 Optic Lobes, MB: Mushroom Bodies, SIP: Superior Intermediate Protocerebrum, PB:  
729 Protocerebral Bridge, FB: Fan-shaped Body, LAL: Lateral Accessory Lobe).

730

731 **Extended data figure 2**

**a**

90 views at random positions and orientations

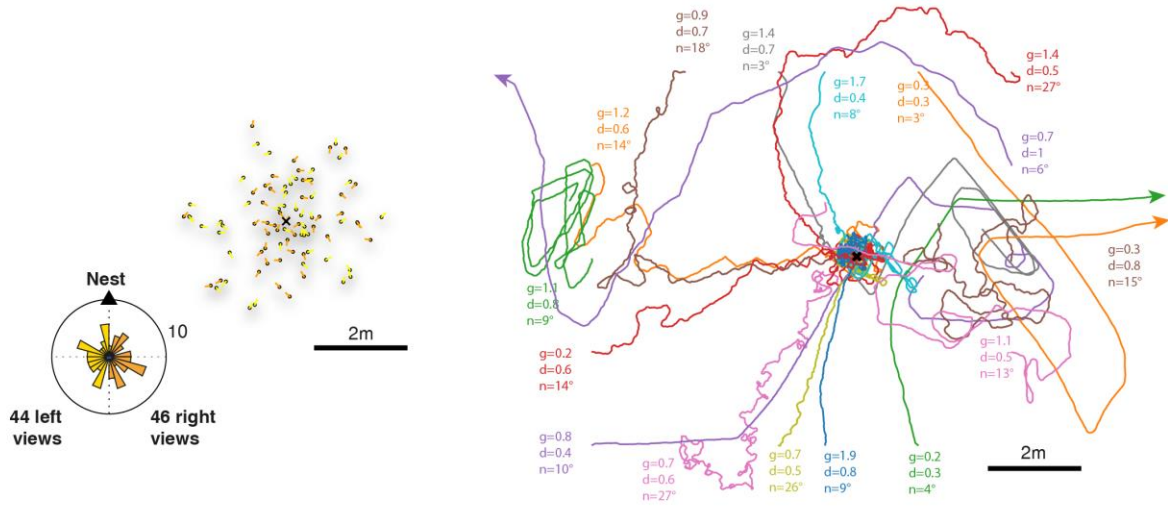

**b**

11,817 views along 6 learning walks

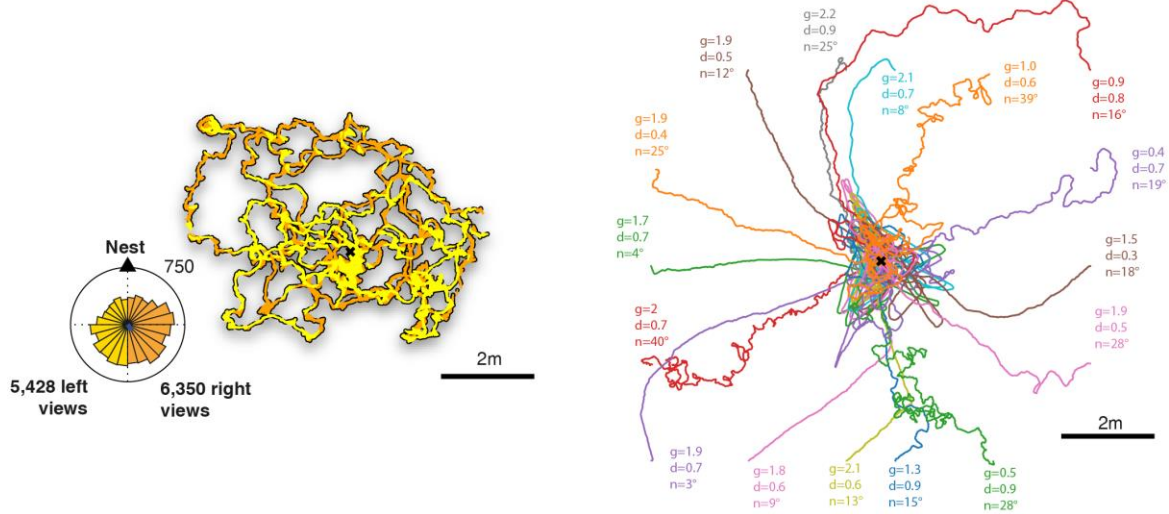

**c**

34,482 views along 13 learning walks

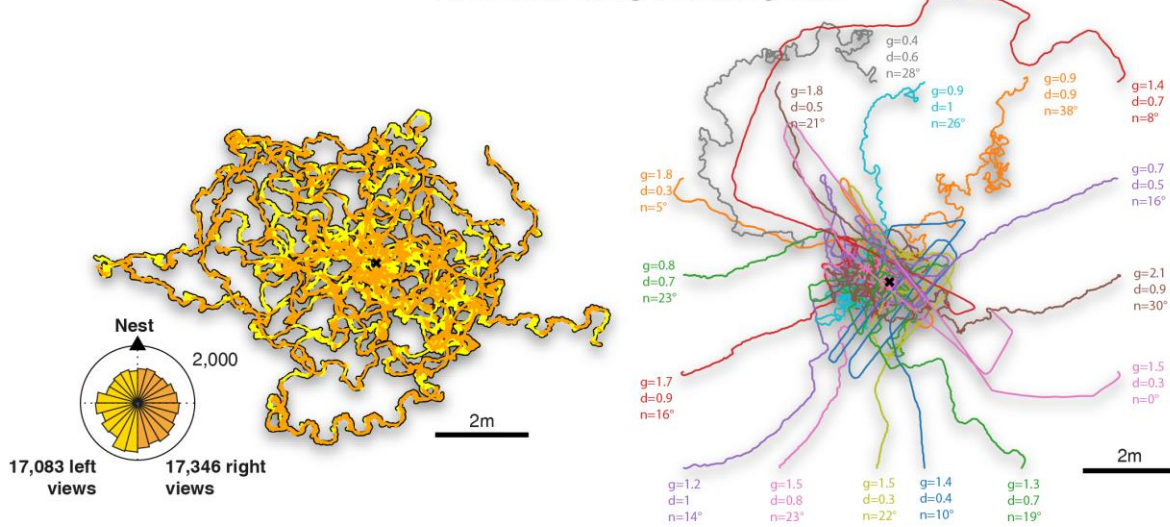

733 **Extended data figure. 2. Homing is robust to various training regimes.** Paths displayed by  
734 the agent when released around the nest with randomly chosen parameter values ( $g$ =: motor  
735 gain;  $d$ =: FBN decay;  $n$ =: motor noise, see the ‘parameter description’ section for detailed  
736 explanation) (right column) after learning views in different configurations (left column).  
737 Orange and yellow indicate how views are categorised as facing right or left from the goal, and  
738 thus being respectively learnt in the left or right MB lobes compartments (see Extended data  
739 figure 2 for details of the model implementation). Circular histograms show the number of left  
740 and right views experienced for learning. **a.** 90 views taken at random positions around the nest  
741 (up to 3m away from the nest) and facing in random directions, are enough for the agent to  
742 subsequently home and display a search at the nest. The failure of some agents suggests that  
743 the catchment area is nonetheless restricted here. **b,c.** Using a large amount of views sampled  
744 continuously (at 100fps) from multiple real ants learning walks enable the agent to home  
745 robustly, and demonstrates that memory load is not a problem. **a,b,c.** All agents were equipped  
746 with 20,000 Kenyon Cells per hemispheres, and embedded in the reconstructed natural world  
747 of Canberra (see figure 5), albeit the nest location within the world varied. Note that the scale  
748 of movements relative to the world, which can be chosen arbitrarily, is here higher than in figure  
749 5, indicating that the model is effective across various amounts of visual change in relation to  
750 movements. This also suggests that the amount of visual change experienced does not need to  
751 be precisely controlled by the agent when effecting a learning walk.  
752

753 **Extended data figure 3.**

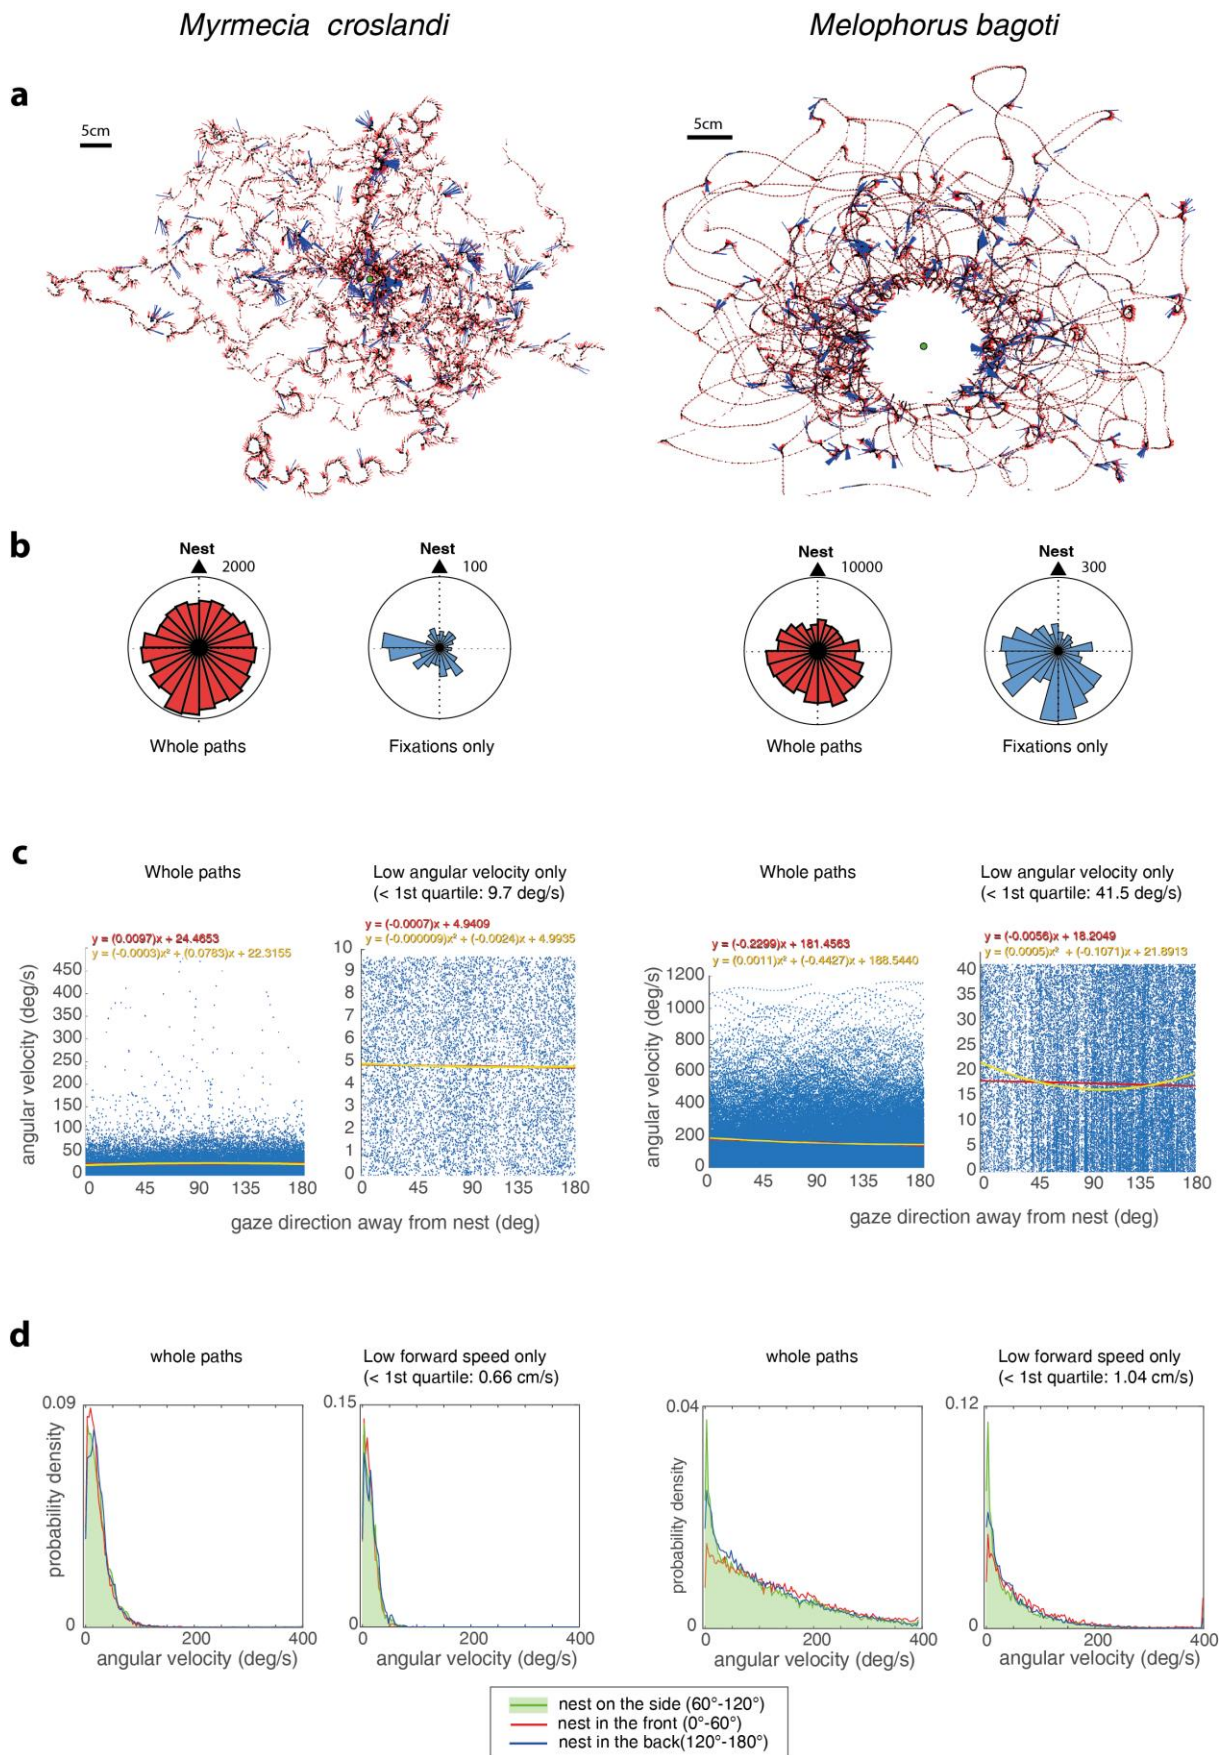

755 **Extended data figure 3. Ants expose their gaze in all direction during learning walks.**

756 **a.** Examples of learning walks recorded in *Myrmecia crosslandi* (courtesy of Jochen Zeil, see  
757 also <sup>22</sup> and *Melophorus bagoti* (from a previous data set used in <sup>15</sup>) around their nest (green  
758 circle). The absence of recording in the centre for *M. bagoti* results from an experimental funnel  
759 around the nest that the ants had to climb before reaching ground level. Dots indicate position  
760 of the head (for *M. crosslandi*) or body centroid (for *M. bagoti*) and vectors indicate gaze  
761 direction across the recorded frames. Blue vectors mark the instant of ‘fixations’ (when both  
762 angular velocity and forward speed are simultaneously  $< 1^{\text{st}}$  decile of their respective  
763 distribution, for each individual). **b.** Circular histogram of the number of views experienced  
764 according to their orientation relative to the nest (scale indicated for the circles’ rim), during  
765 the whole learning walks or during fixations only (see **a**). Ants show no tendency to bias their  
766 gaze towards the nest direction. **c.** Instantaneous angular velocity of the head according to the  
767 direction faced relative to the nest, for the whole learning walks or only moments of low angular  
768 velocities. In abscises,  $0^{\circ}$  indicates facing towards the nest,  $180^{\circ}$  indicates facing in the anti-  
769 nest direction, left and right bias are pooled together (by using absolute values). Linear (red)  
770 and quadratic fit (yellow) are shown. The flatness of the fits indicates that ants show no  
771 tendency to regulate their angular speed according to the direction faced relative to the nest. If  
772 anything, in *M. bagoti* ants, low angular speed tends to happen slightly more often when the  
773 nest lies on the sides rather than in front or behind. **d.** Relative probability distributions of  
774 angular velocities according to whether the nest stands rather in front ( $0^{\circ}$  to  $60^{\circ}$ , red), in the  
775 back ( $120^{\circ}$  to  $180^{\circ}$ , blue) or on the sides (between  $60^{\circ}$  and  $120^{\circ}$ , green line + area). Left and  
776 right sides are pulled together using absolute values, so that each of the three categories covers  
777  $120^{\circ}$  (a third) of the directional space. The similarity of the distributions indicates, here also,  
778 no strong tendency to regulate angular speed according to the direction faced relative to the  
779 nest; apart from a tendency in *M. bagoti* to display low angular velocities slightly more often  
780 when the nest is on the sides.
